# Supplementary material for: Genome-wide Identification, Evolutionary and Functional Analyses of Kfb Family Members in Potato
Source: Research Square preprint supplement (doi:10.21203/rs.3.rs-1193858/v1), 2022-01-11
Supplement: Supplementary file 1 [file 48f03a3d75703af5fb9cd8e1.docx]

**Additional file 3**

**
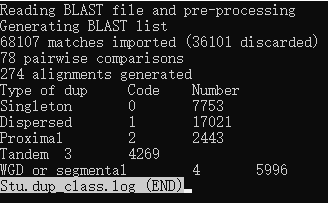
**

**Figure S1** Gene duplication analysis of potato genome.Singleton: single copy genes; Proximal: adjacent but discontinuous repetitive genes on the same chromosome; Tandem: tandem duplications; WGD or segmental: whole genome duplications or segmental duplications; Dispersed: dispersed genes.

**
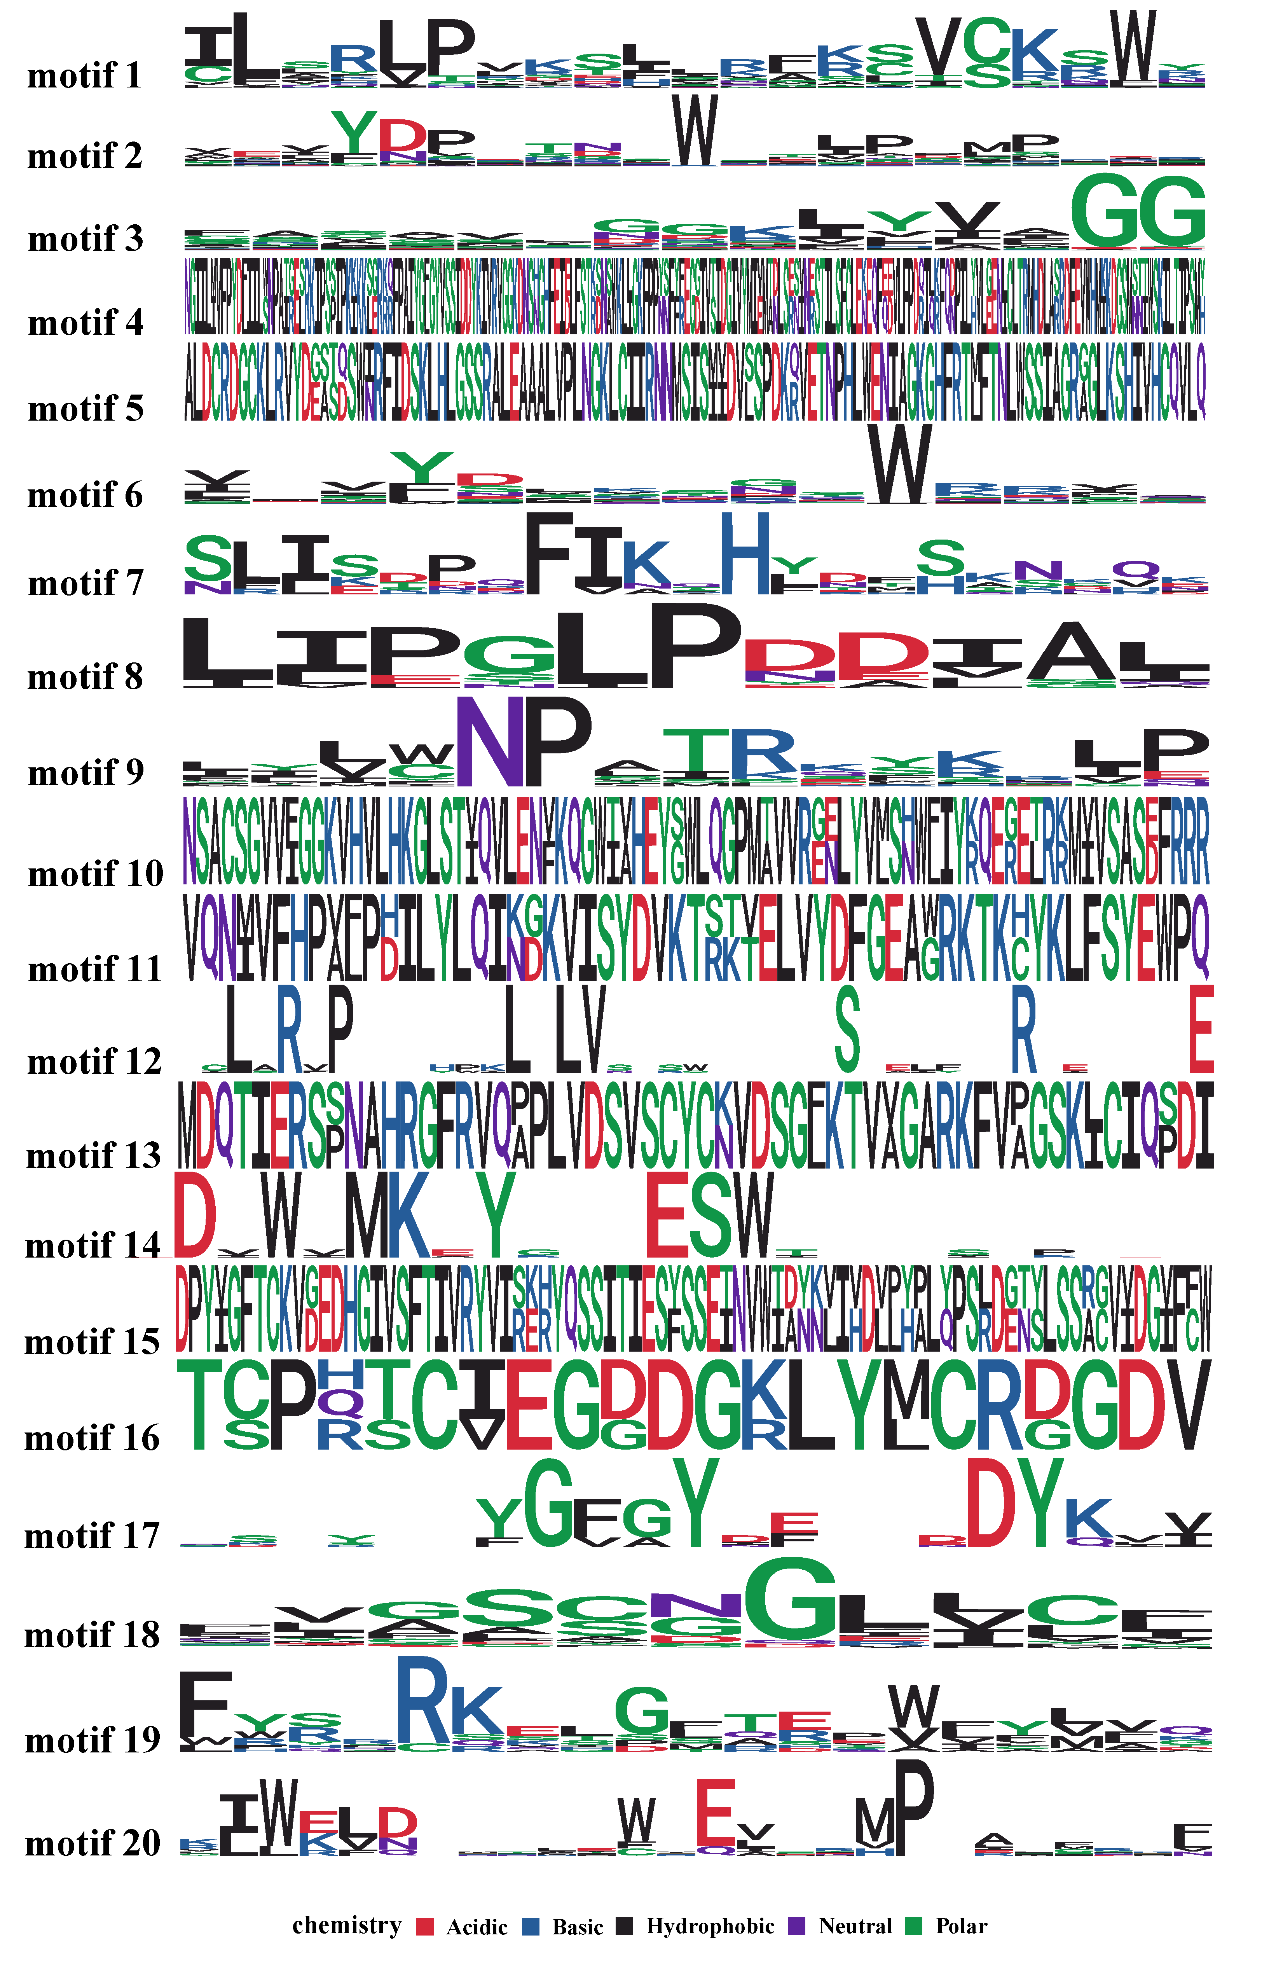
**

**Figure S2** Sequence logos of conserved motifs in StKFB proteins.


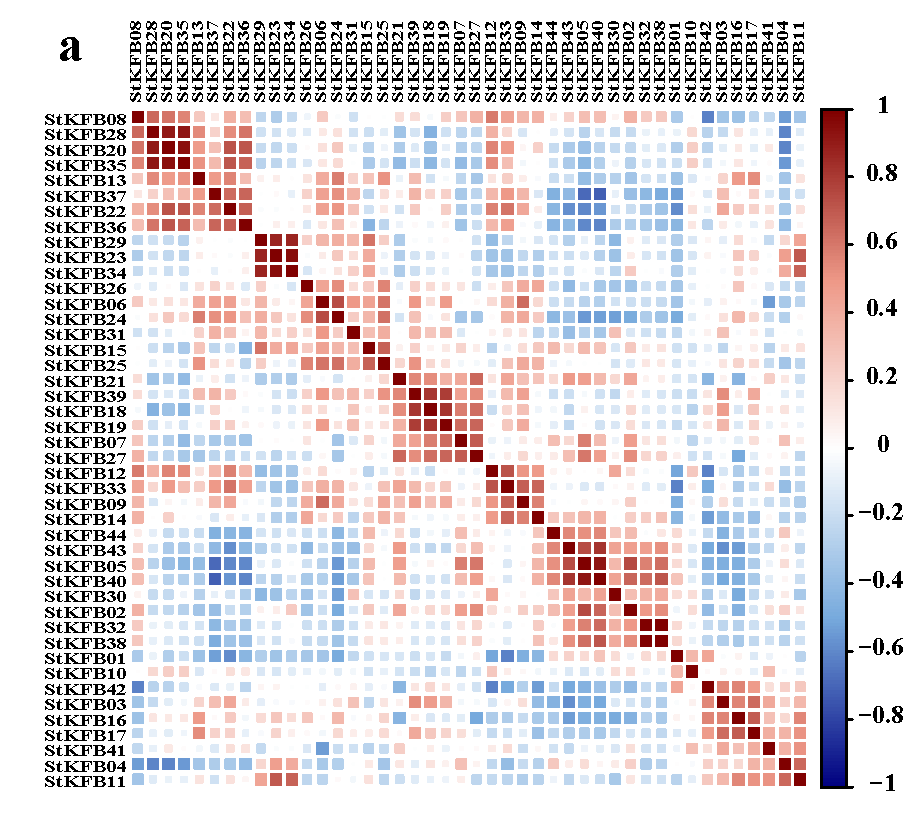


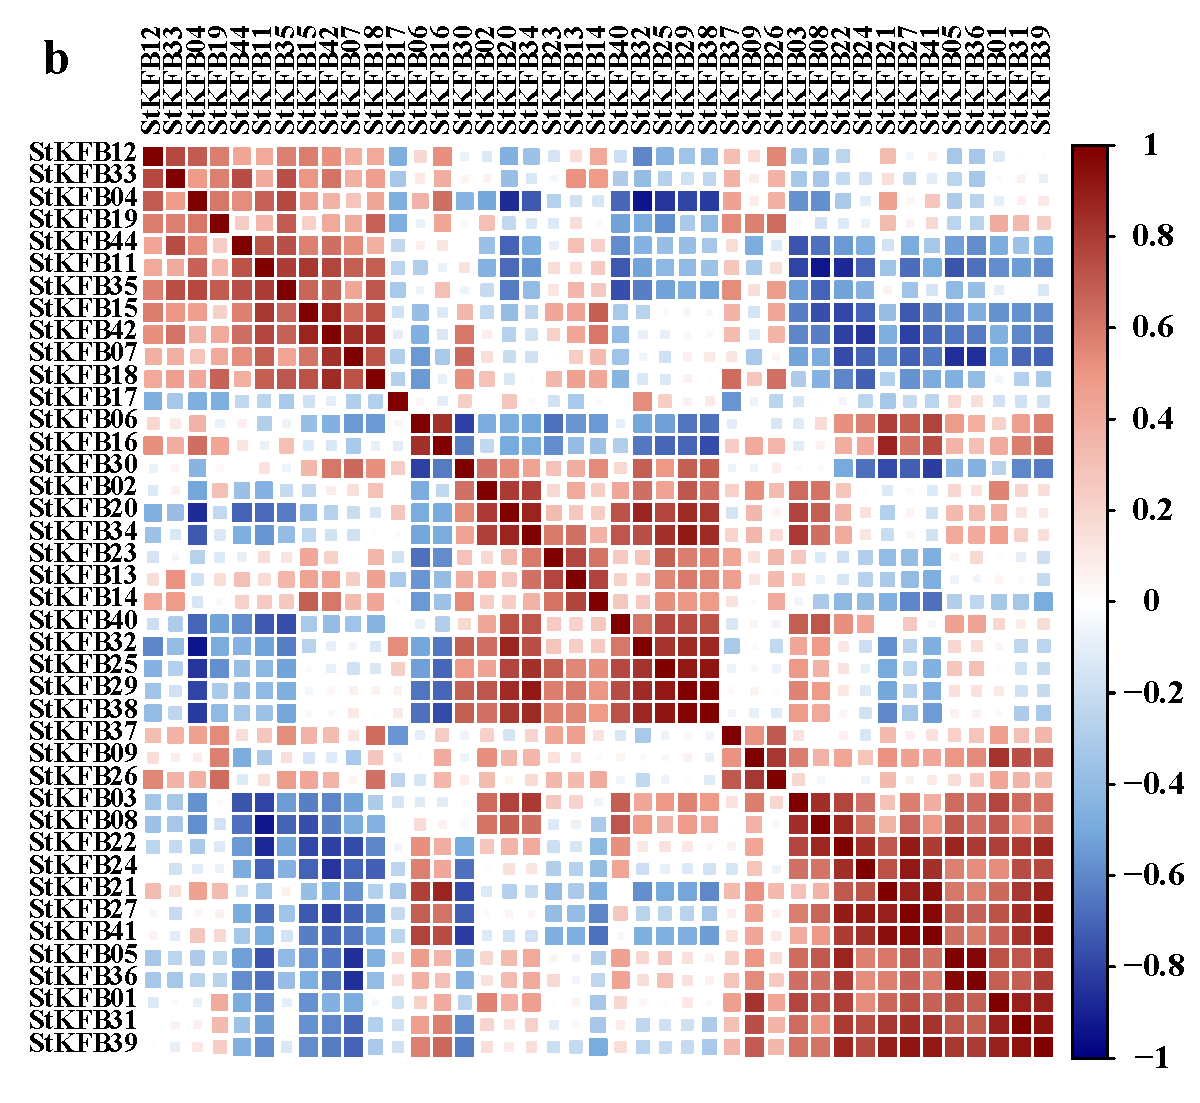


**
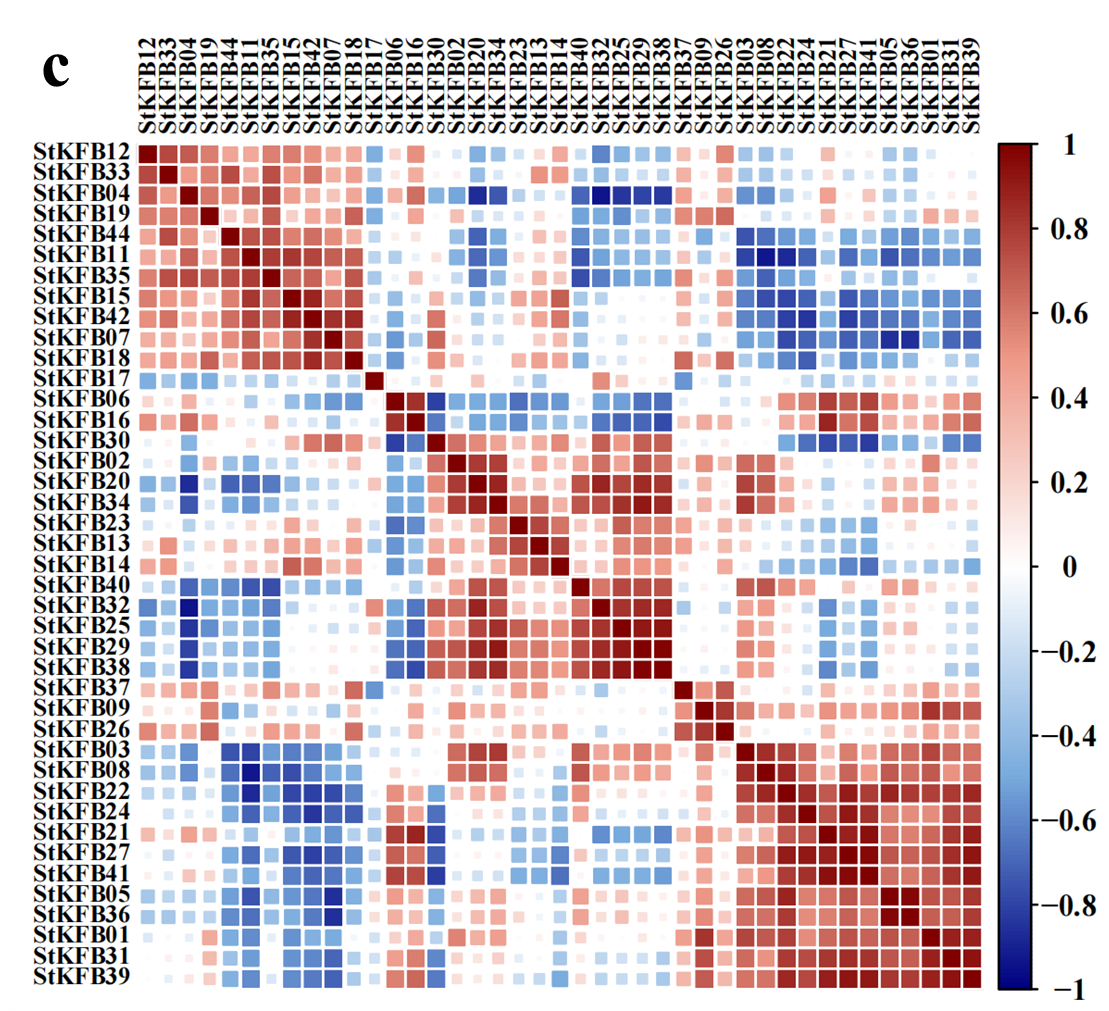
**

**Figure S3** The correlation analysis between the expression patterns of *StKFBs* in diverse potato tissues (**a**), in potato plants with different treatments (**b**) and in three colored potato tubers (**c**).


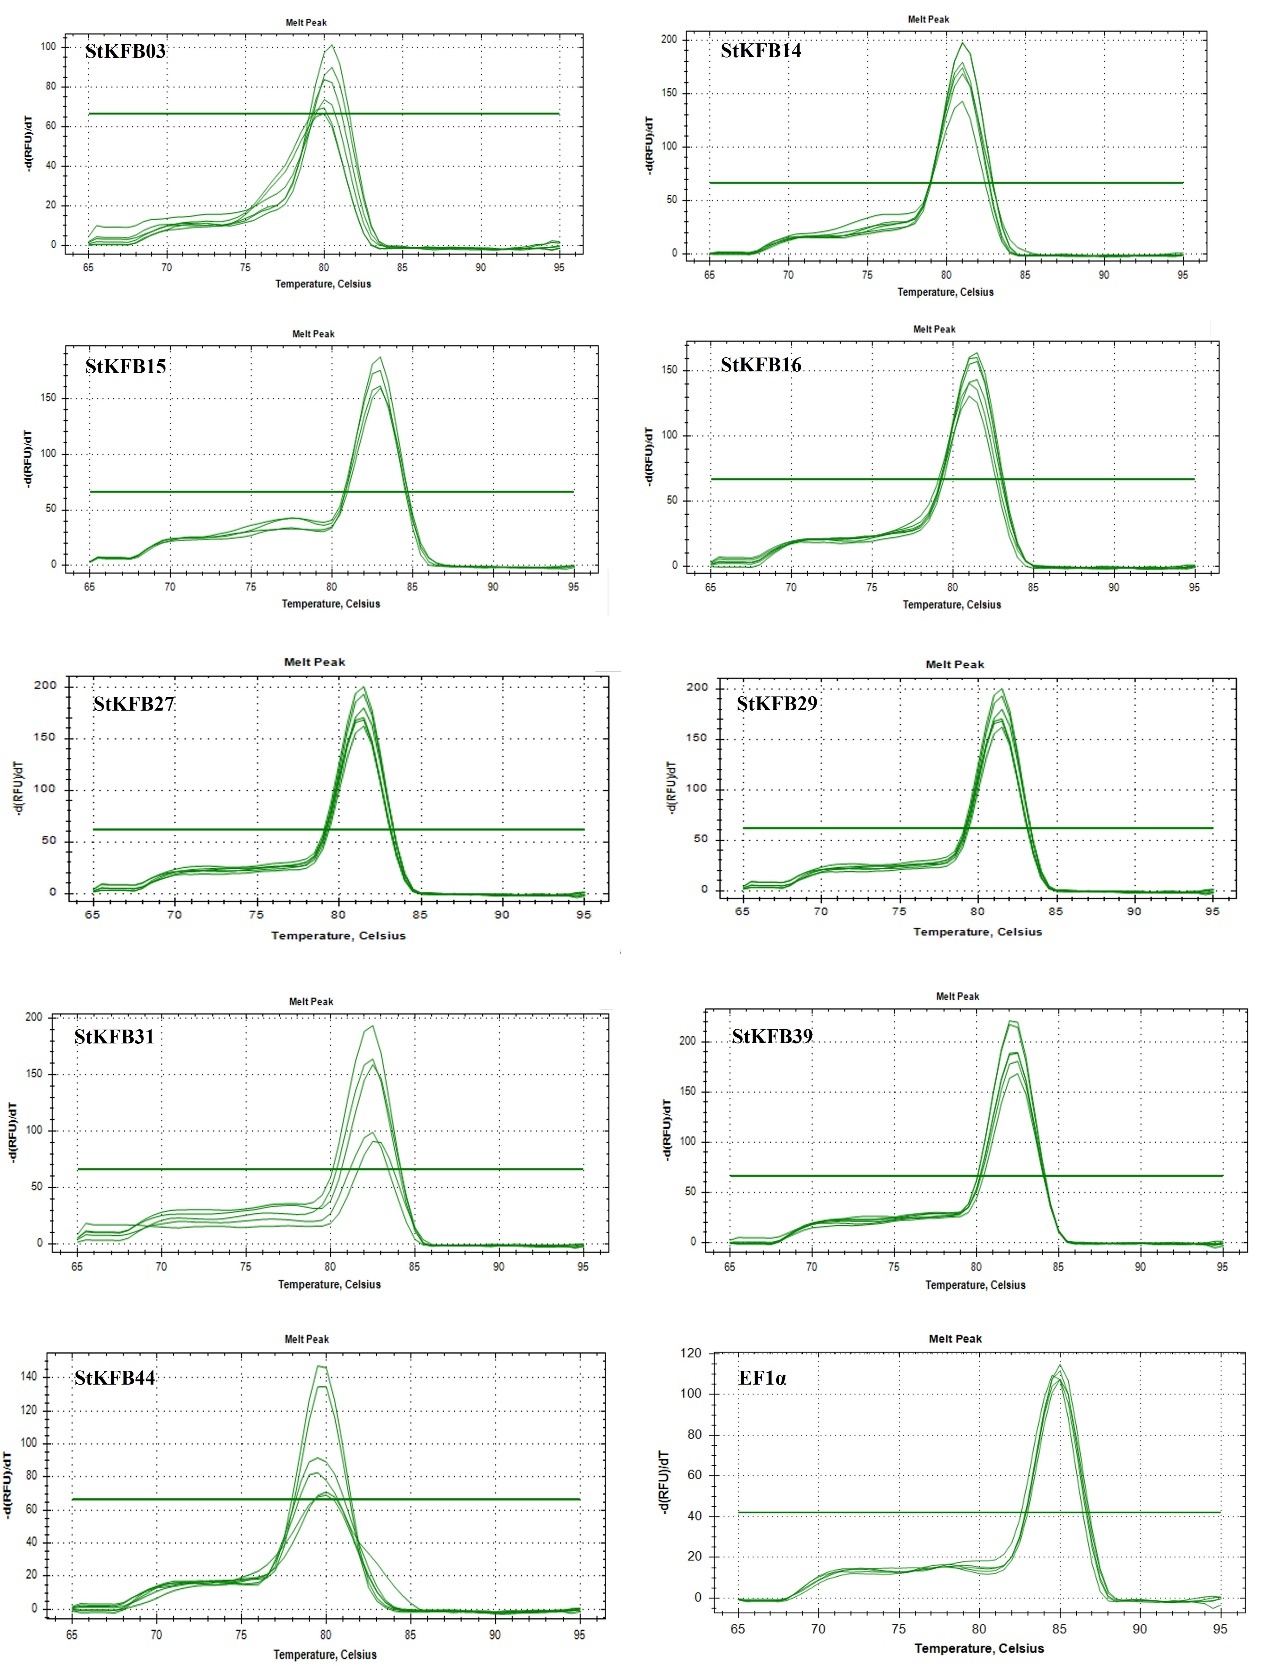


**Figure S4** Melting curves of primers for qRT-PCR.

**
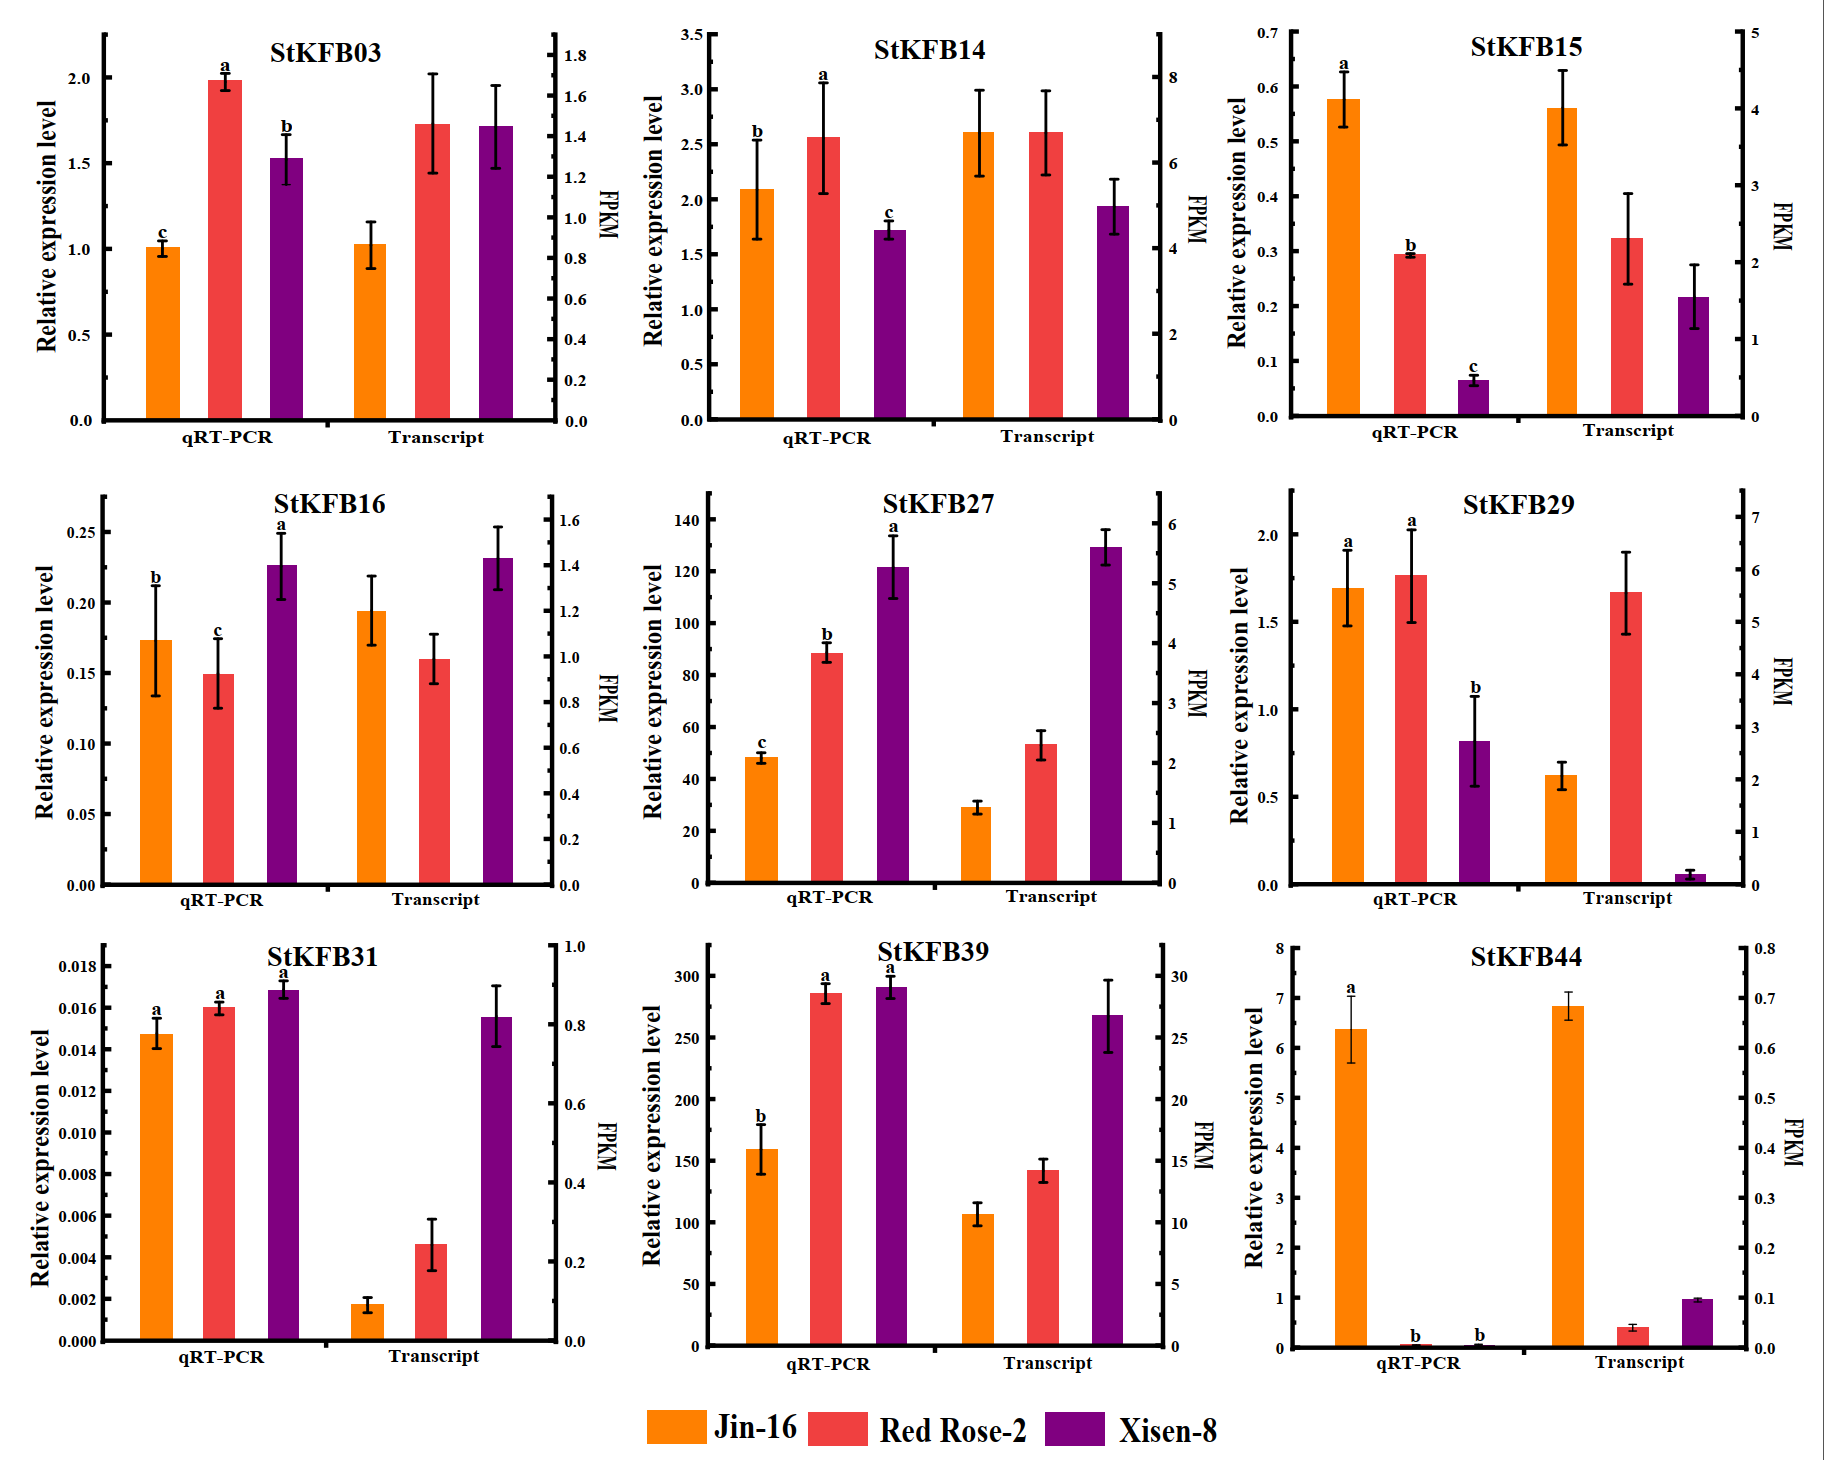
**

**Figure S5** Comparison of the expression levels of the 9 selected *StKFB* genes determined by qRT-PCR and transcriptome sequencing.


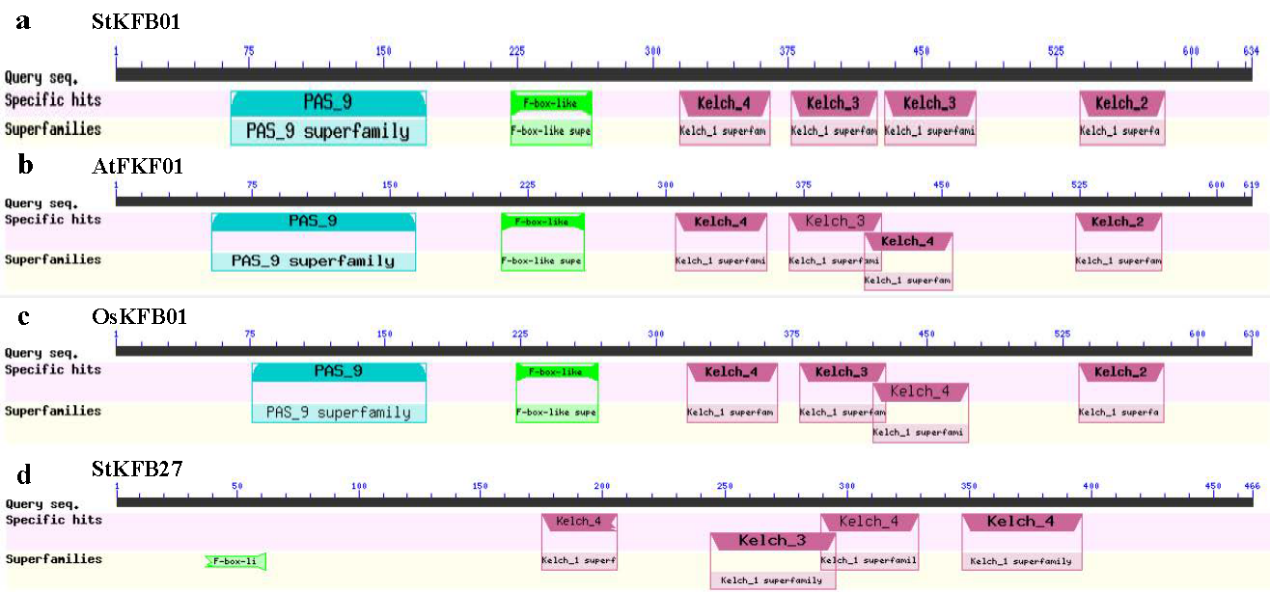


**Figure S6** Conserveddomain analysis of StKFB01, AtFKF1, OsFKF1 and StKFB27.
